# Supplementary material for: Impact of Chronic Obstruction Pulmonary Disease on Survival in Patients with Advanced Stage Lung Squamous Cell Carcinoma Undergoing Concurrent Chemoradiotherapy
Source: Cancers (Basel). 2021 Jun 28;13(13):3231. doi: 10.3390/cancers13133231 (PMC8268442; doi:10.3390/cancers13133231)
Supplement: Supplementary file 1 [file cancers-13-03231-s001.zip › cancers-1286599-supplementary.pdf]

# Supplementary Materials: Impact of Chronic Obstruction Pulmonary Disease on Survival in Patients with Advanced Stage Lung Squamous Cell Carcinoma Undergoing Concurrent Chemoradiotherapy

**Supplemental Table S1.** Multivariable Cox regression of COPD death with propensity score inverse probability of treatment weighting for patients with advanced stage lung squamous cell carcinoma with or without chronic obstructive pulmonary disease before concurrent chemoradiotherapy.

|                                                                    | Crude HR (95% CI) |             | Adjusted HR (95% CI)* |             | <i>p</i> |
|--------------------------------------------------------------------|-------------------|-------------|-----------------------|-------------|----------|
| Frequency of hospitalizations for COPDAE before diagnosis (ref. 0) |                   |             |                       |             |          |
| 1                                                                  | 1.69              | (1.48,2.94) | 1.45                  | (1.31,2.61) | <0.0001  |
| ≥2                                                                 | 2.24              | (1.82,3.67) | 2.03                  | (1.64,3.41) | <0.0001  |
| Age (ref. Age > 85 years)                                          |                   |             |                       |             |          |
| Age ≤ 65 years                                                     | 0.31              | (0.26,0.76) | 0.54                  | (0.49,0.71) | <0.0001  |
| 65 years < Age ≤ 75 years                                          | 0.44              | (0.37,0.71) | 0.46                  | (0.42,0.71) | <0.0001  |
| 75 years < Age ≤ 85 years                                          | 0.67              | (0.58,0.98) | 0.81                  | (0.75,0.88) | <0.0001  |
| Sex (ref. Female)                                                  |                   |             |                       |             |          |
| Male                                                               | 1.34              | (1.23,3.45) | 1.07                  | (1.02,3.13) | <0.0001  |
| AJCC clinical stage (ref. Stage IIIA)                              |                   |             |                       |             |          |
| Stage IIIB                                                         | 0.88              | (0.73,2.08) | 0.95                  | (0.86,2.08) | 0.2287   |
| Histological degree of differentiation (ref. Low)                  |                   |             |                       |             |          |
| Moderate                                                           | 0.93              | (0.65,2.75) | 1.05                  | (0.92,2.51) | 0.4523   |
| High                                                               | 1.08              | (0.57,3.38) | 0.89                  | (0.86,3.11) | 0.3885   |
| CCI score (ref. 0)                                                 |                   |             |                       |             |          |
| 1                                                                  | 1.30              | (1.05,2.58) | 0.83                  | (0.70,2.07) | 0.3791   |
| ≥2                                                                 | 1.28              | (1.17,3.57) | 1.11                  | (1.05,2.18) | <0.0001  |
| Diabetes (ref. No)                                                 |                   |             |                       |             |          |
| Yes                                                                | 1.07              | (0.98,2.17) | 1.03                  | (0.72,1.96) | 0.3479   |
| Chronic bronchitis (ref. No)                                       |                   |             |                       |             |          |
| Yes                                                                | 1.25              | (1.03,2.27) | 1.22                  | (1.03,1.53) | 0.0056   |
| Asthma (ref. No)                                                   |                   |             |                       |             |          |
| Yes                                                                | 1.12              | (1.03,1.51) | 1.26                  | (1.11,3.18) | 0.0078   |
| Emphysema (ref. No)                                                |                   |             |                       |             |          |
| Yes                                                                | 1.76              | (1.61,1.93) | 1.27                  | (1.14,1.78) | 0.0051   |
| Cardiovascular diseases (ref. No)                                  |                   |             |                       |             |          |
| Yes                                                                | 1.49              | (1.32,1.76) | 1.31                  | (1.15,1.58) | 0.0069   |
| AMI (ref. No)                                                      |                   |             |                       |             |          |
|                                                                    | 1.65              | (1.10,2.19) | 1.43                  | (1.07,1.75) | 0.0012   |
| Stroke (ref. No)                                                   |                   |             |                       |             |          |
|                                                                    | 1.11              | (0.81,1.97) | 1.10                  | (0.91,1.42) | 0.4205   |
| Income level (ref. <NTD18,000)                                     |                   |             |                       |             |          |
| NTD18,000–22,500                                                   | 0.92              | (0.61,1.21) | 1.04                  | (0.87,1.10) | 0.0910   |
| NTD22,500–30,000                                                   | 0.81              | (0.57,1.15) | 0.77                  | (0.51,1.11) | 0.1710   |
| >NTD30,000                                                         | 0.71              | (0.41,0.89) | 0.70                  | (0.47,0.85) | <0.0001  |
| Urbanization (ref. Rural)                                          |                   |             |                       |             |          |
| Urban                                                              | 0.77              | (0.64,1.91) | 0.91                  | (0.69,1.75) | 0.8175   |

\*All covariates mentioned in Table 3 were adjusted. COPD, chronic obstruction pulmonary disease; CCRT, concurrent chemoradiotherapy; COPDAE, COPD with acute exacerbation; AJCC, American Joint Committee on Cancer; CCI, Charlson comorbidity index; AMI, acute myocardial infarction; NTD, New Taiwan Dollar; Ref, reference group; aHR, adjusted hazard ratio; CI, confidence interval; HR, hazard ratio.

**Supplemental Table S2.** Multivariable Cox regression of lung cancer death with propensity score inverse probability of treatment weighting for patients with advanced stage lung squamous cell carcinoma with or without chronic obstructive pulmonary disease before concurrent chemoradiotherapy.

|                                                                    | Crude HR (95% CI) |             | Adjusted HR (95% CI)* |             | p       |
|--------------------------------------------------------------------|-------------------|-------------|-----------------------|-------------|---------|
| COPD (ref. non-COPD)                                               |                   |             |                       |             |         |
| COPD                                                               | 1.08              | (0.77,1.66) | 1.01                  | (0.67,1.54) | 0.4117  |
| Frequency of hospitalizations for COPDAE before diagnosis (ref. 0) |                   |             |                       |             |         |
| 1                                                                  | 1.36              | (1.19,1.60) | 1.21                  | (1.09,1.39) | <0.0001 |
| ≥2                                                                 | 1.81              | (1.47,2.21) | 1.63                  | (1.34,1.97) | <0.0001 |
| Age (ref. Age > 85 years)                                          |                   |             |                       |             |         |
| Age ≤ 65 years                                                     | 0.31              | (0.25,0.36) | 0.53                  | (0.49,0.61) | <0.0001 |
| 65 years < Age ≤ 75 years                                          | 0.48              | (0.41,0.59) | 0.52                  | (0.42,0.62) | <0.0001 |
| 75 years < Age ≤ 85 years                                          | 0.73              | (0.61,0.85) | 0.81                  | (0.75,0.88) | <0.0001 |
| Sex (ref. Female)                                                  |                   |             |                       |             |         |
| Male                                                               | 1.34              | (1.23,1.55) | 1.07                  | (1.01,1.14) | <0.0297 |
| AJCC clinical stage (ref. Stage IIIA)                              |                   |             |                       |             |         |
| Stage IIIB                                                         | 1.38              | (1.16,1.54) | 1.21                  | (1.18,1.50) | <0.0001 |
| Histological degree of differentiation (ref. Low)                  |                   |             |                       |             |         |
| Moderate                                                           | 1.18              | (1.05,2.11) | 1.17                  | (1.23,2.09) | <0.0001 |
| High                                                               | 1.24              | (1.16,1.78) | 1.48                  | (1.20,2.04) | <0.0001 |
| CCI score (ref. 0)                                                 |                   |             |                       |             |         |
| 1                                                                  | 1.12              | (0.99,1.58) | 1.01                  | (0.70,1.03) | 0.4301  |
| ≥2                                                                 | 1.15              | (1.04,1.28) | 1.03                  | (0.96,1.09) | 0.6719  |
| Diabetes (ref. No)                                                 |                   |             |                       |             |         |
| Yes                                                                | 1.07              | (0.91,1.17) | 1.01                  | (0.73,1.16) | 0.3117  |
| Chronic bronchitis (ref. No)                                       |                   |             |                       |             |         |
| Yes                                                                | 1.01              | (0.78,1.07) | 1.00                  | (0.73,1.07) | 0.8619  |
| Asthma (ref. No)                                                   |                   |             |                       |             |         |
| Yes                                                                | 0.91              | (0.81,1.14) | 0.95                  | (0.67,1.26) | 0.4304  |
| Emphysema (ref. No)                                                |                   |             |                       |             |         |
| Yes                                                                | 1.14              | (0.94,1.24) | 0.97                  | (0.77,1.13) | 0.3536  |
| Cardiovascular diseases (ref. No)                                  |                   |             |                       |             |         |
| Yes                                                                | 0.95              | (0.88,1.05) | 0.96                  | (0.79,1.11) | 0.4988  |
| AMI (ref. No)                                                      |                   |             |                       |             |         |
| Yes                                                                | 0.93              | (0.89,1.13) | 0.91                  | (0.82,1.06) | 0.1590  |
| Stroke (ref. No)                                                   |                   |             |                       |             |         |
| Yes                                                                | 0.97              | (0.81,1.07) | 0.94                  | (0.83,1.21) | 0.4190  |
| Income level (ref. <NTD18,000)                                     |                   |             |                       |             |         |
| NTD18,000–22,500                                                   | 0.97              | (0.66,1.21) | 0.92                  | (0.89,1.20) | 0.3426  |
| NTD22,500–30,000                                                   | 0.84              | (0.68,1.03) | 0.88                  | (0.70,1.04) | 0.1967  |
| >NTD30,000                                                         | 0.46              | (0.36,0.58) | 0.70                  | (0.58,0.86) | <0.0001 |
| Urbanization (ref. Rural)                                          |                   |             |                       |             |         |
| Urban                                                              | 0.73              | (0.62,0.80) | 0.75                  | (0.71,0.81) | <0.0001 |

\*All covariates mentioned in Table 3 were adjusted. COPD, chronic obstruction pulmonary disease; CCRT, concurrent chemoradiotherapy; COPDAE, COPD with acute exacerbation; AJCC, American Joint Committee on Cancer; CCI, Charlson comorbidity index; AMI, acute myocardial infarction; NTD, New Taiwan Dollar; Ref, reference group; aHR, adjusted hazard ratio; CI, confidence interval; HR, hazard ratio.

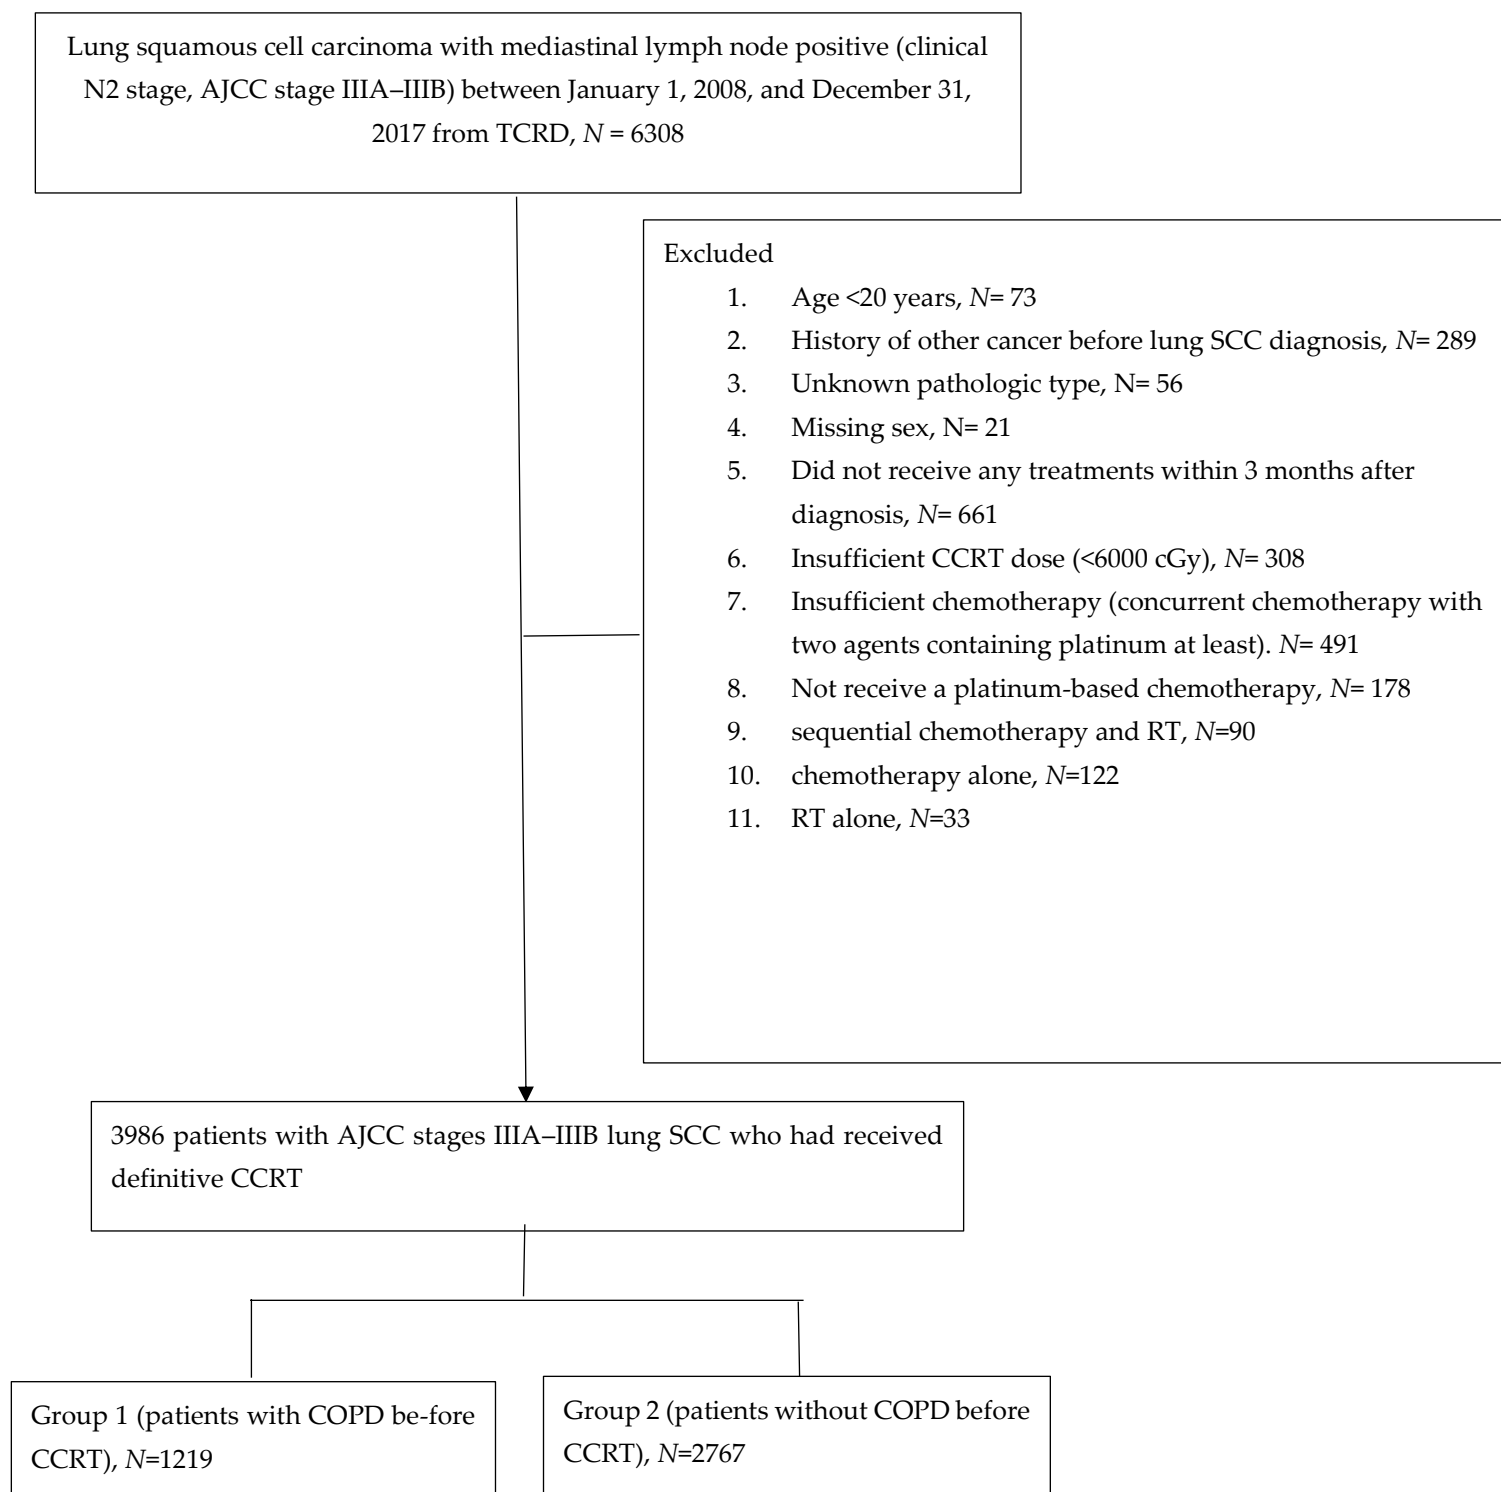

**Supplemental Figure S1.** Flow-chart of patient selection.
